# Supplementary material for: CSF1R regulates the dendritic cell pool size in adult mice via embryo-derived tissue-resident macrophages
Source: PubMed Central journal article supplement (PMC6290072; doi:10.1038/s41467-018-07685-x), 2018-12-11
Supplement: 41467_2018_7685_MOESM2_ESM.pdf [file 41467_2018_7685_MOESM2_ESM.pdf]

**CSF1R regulates the dendritic cell pool size in adult mice via embryo-derived tissue-resident macrophages.**

Percin et al.

Supplementary Figure 1

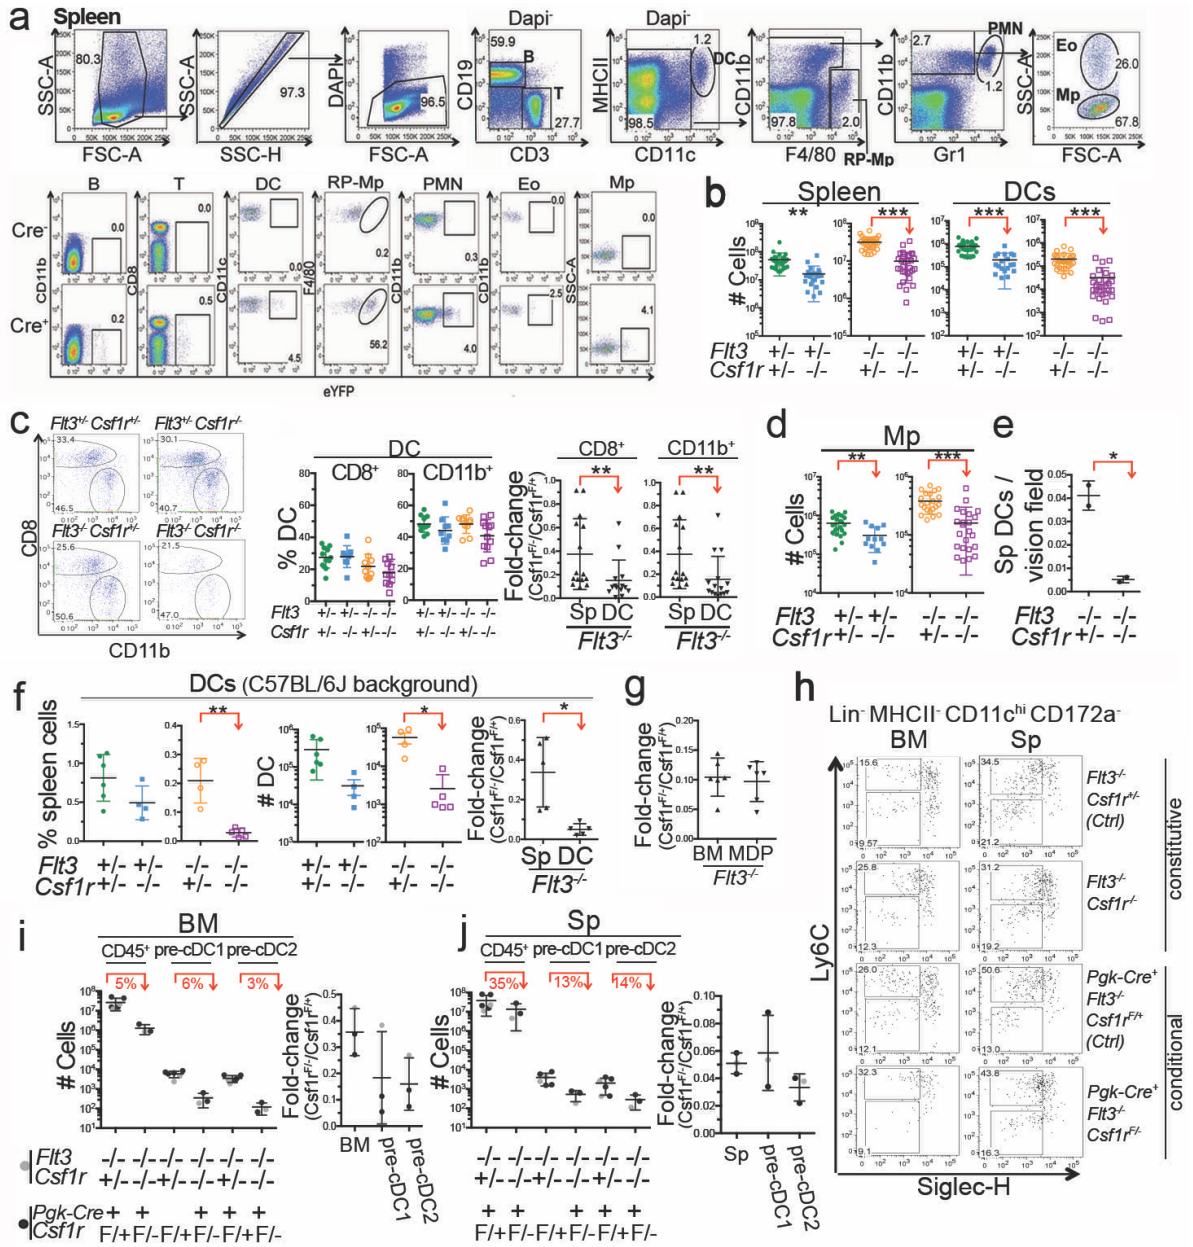

**Supplementary Fig. 1. Identification and numbers of spleen cells and their precursors.** (a) Spleen cells were analyzed for the cell surface expression of CD11b, Gr-1, MHCII, CD11c, F4/80 as indicated to identify T and B lymphocytes, neutrophils (PMN), DCs, red-pulp macrophages (RP-Mp), eosinophils, and monocytes (top). Labeling frequencies of indicated cell types using *Rank-iCre<sup>+</sup>;eYFP<sup>wt/KI</sup>* mice (bottom two rows). (b) Spleen cellularity (left) and DC numbers (right) in mice of indicated genotypes. SD is shown. (c) Dot plots show spleen DCs (MHCII<sup>+</sup> CD11c<sup>hi</sup>) from mice of indicated genotypes that were resolved for the expression of CD8 and CD11b (left). Frequencies of spleen DC subsets (middle). Fold-change of spleen cells and DC subsets of indicated genotypes. Data is pooled from 6 experiments (right). SD is shown. (d) Spleen macrophage numbers (CD11b<sup>+</sup> F4/80<sup>lo</sup>) in mice of indicated genotypes. SD is shown. (e) Quantification of DCs on histological sections shown in Fig. 1e of the manuscript. DC numbers were determined per vision field (2-4 counted) using sectioned samples from mice from 2 independent experiments. SD is shown. (f) Frequencies, numbers, and fold-change of spleen DCs of indicated genotypes in C57BL/6J congenic mice. The null allele of *Csf1r* was bred back 10-times onto the C57BL/6J genetic background; the viability of *Csf1r<sup>-/-</sup>* mice decreased to 0.87%. We analyzed a total of 578 mice from heterozygous breedings and obtained 5 double mutant mice over a time period of four years. SD is shown. (g) Fold-change of bone marrow (BM) cells and MDPs of indicated genotypes. MDP: Lin<sup>-</sup> (Lin=CD3 CD19 NK1.1 Ter119 CD11b Gr-1 B220) Sca-1<sup>-</sup> CD115<sup>+</sup> <sup>1</sup>. SD is shown. (h) Identification of pre-cDC1 (Lin<sup>-</sup> MHCII<sup>-</sup> CD11c<sup>hi</sup> CD172a<sup>-</sup> Ly6C<sup>-</sup> Siglec-H/CD33<sup>-</sup>) and pre-cDC2 (Lin<sup>-</sup> MHCII<sup>-</sup> CD11c<sup>hi</sup> CD172a<sup>-</sup> Ly6C<sup>+</sup> Siglec-H<sup>-</sup>) <sup>2,3</sup> in the bone marrow (left) and spleen (right) in constitutive (top) and conditional (bottom) *Flt3* and *Csf1r* null mice. (i,j) Quantification and fold-change of pre-cDC1 and pre-cDC2 cells in mice of indicated genotypes in the bone marrow (i) or spleen (j). SD are shown.

**Supplementary Figure 2**

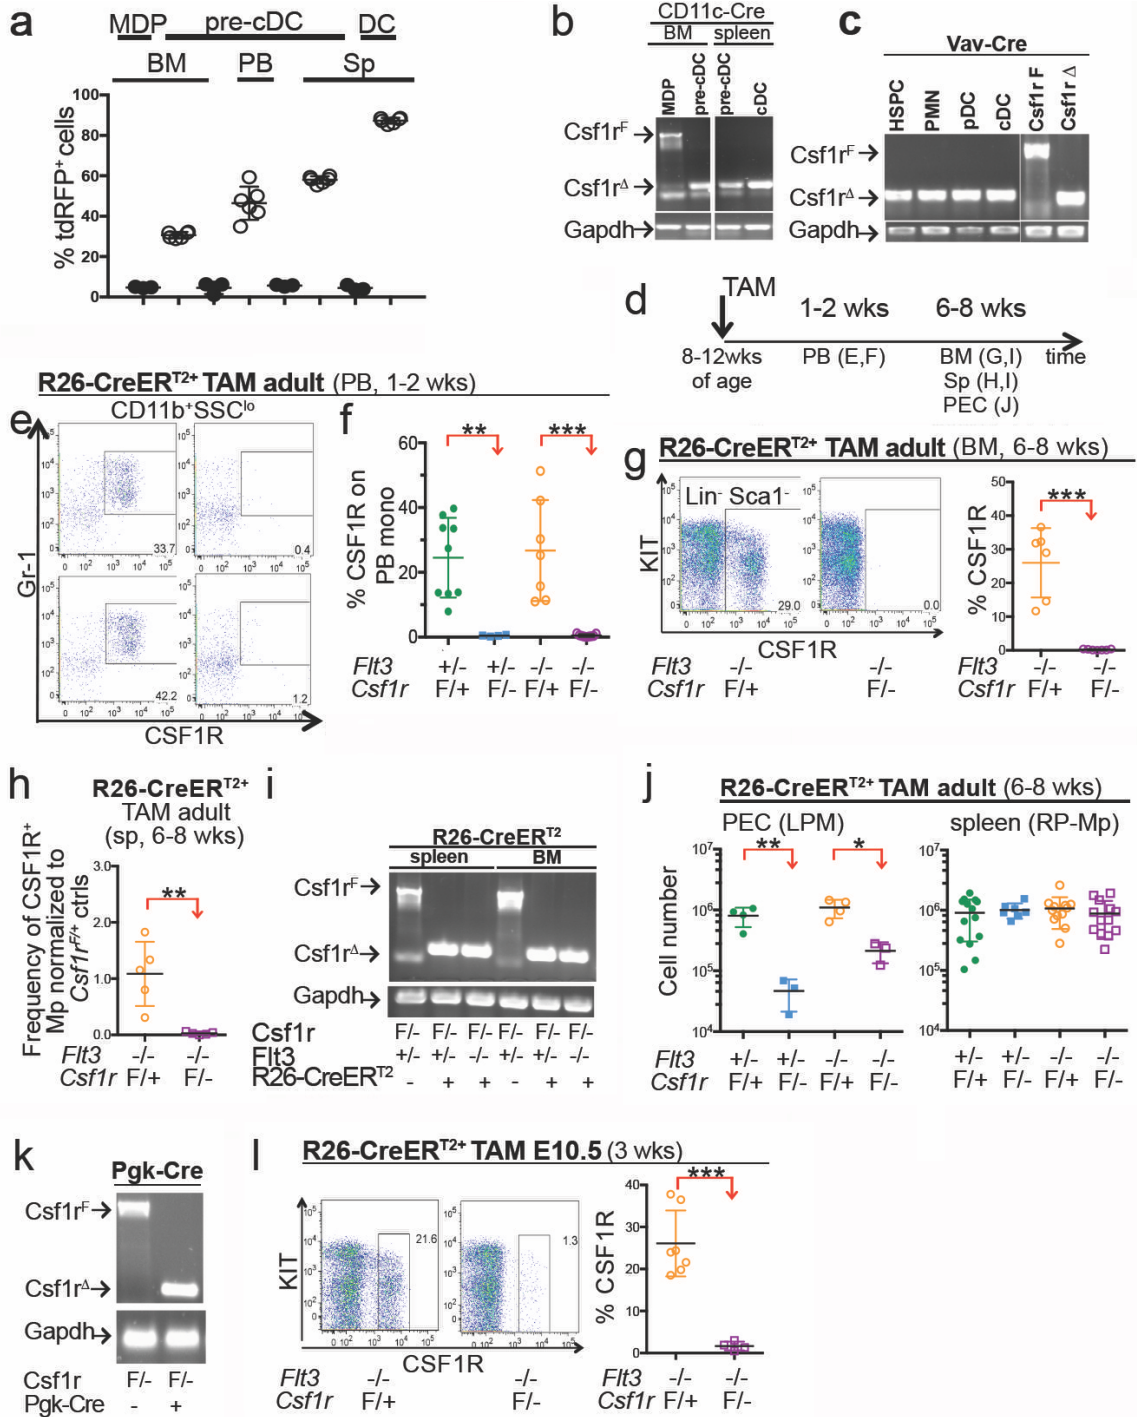

**Supplementary Fig. 2. Efficient depletion of CSF1R expression using the LoxP-flanked *Csf1r* allele.** (a)  $CD11c-Cre^+;tdRFP^{wt/ki}$  mice<sup>4</sup> were generated and indicated cell types identified by cell surface staining and the frequency of tdRFP<sup>+</sup> cells within these populations determined (open circles  $CD11c-Cre^+;tdRFP^{wt/ki}$ ; closed circles  $CD11c-Cre^+;tdRFP^{wt/wt}$ ). Pre-cDC were identified as Lin<sup>-</sup> (Lin=CD3 CD19 Ter119 NK1.1 B220) MHCII<sup>-</sup> CD11c<sup>hi</sup> Flt3<sup>+</sup> Sirpa<sup>lo</sup> cells<sup>5</sup>. SD is shown. (b,c) Recombination efficiency in indicated sorter-purified cells from  $CD11c-Cre^+;Flt3^{-/-};Csf1r^{F/-}$  (b) or  $Vav-cre^+;Flt3^{-/-};Csf1r^{F/-}$  (c) mice. (d) Scheme of TAM induction using adult  $R26-CreER^{T2+}$  deleter mice. (e,f) Dot plots show the expression of Gr-1 and CSF1R on CD11b<sup>+</sup> SSC<sup>lo</sup> blood monocytes one week after TAM induction in  $R26-CreER^{T2+};Flt3^{-/-};Csf1r^{F/-}$  and control mice. Graph summarizes the expression of CSF1R on blood monocytes pooled from 4 independent experiments that were TAM-induced 1-2 weeks before (f). SD is shown. (g) Dot plots show the expression of KIT and CSF1R on BM progenitor cells (Lin<sup>-</sup> [Lin=CD3 CD19 NK1.1 Ter119 CD11b Gr-1 B220] Sca-1<sup>-</sup>) from  $R26-CreER^{T2+};Flt3^{-/-};Csf1r^{F/-}$  and control mice 6-8 weeks after TAM induction. Data is pooled from 4 independent experiments. SD is shown. (h) Plots show cell surface expression of CSF1R on spleen CD11b<sup>+</sup> F4/80<sup>lo</sup> macrophages in adult  $R.26-CreER^{T2+};Flt3^{-/-};Csf1r^{F/-}$  mice that were TAM-treated 6-8 weeks before. CSF1R expression was normalized to TAM-treated  $R.26-CreER^{T2+};Flt3^{-/-};Csf1r^{F/+}$  controls. Data shown is pooled from 4 independent experiments. SD is shown. (i) Recombination efficiency in total spleen or bone marrow cells from  $R26-CreER^{T2+};Flt3^{-/-};Csf1r^{F/-}$  mice that were TAM-induced 6-8 weeks earlier at 8-12 weeks of age. (j) Cell numbers of large peritoneal macrophages (left) and spleen RP-MP (right) in adult  $R.26-CreER^{T2+};Flt3^{-/-};Csf1r^{F/-}$  mice that were TAM-treated 6-8 weeks before. Data is pooled from two (PEC) and 7 (spleen) independent experiments. SD is shown. (k) Recombination efficiency determined using tail gDNA from  $Pgk-Cre^+;Csf1r^{F/-}$  and control mice. (l) Dot plots show the expression of KIT and CSF1R on Lin<sup>-</sup> Sca-1<sup>-</sup> bone marrow cells of  $R26-creER^{T2+};Flt3^{-/-};Csf1r^{F/-}$  and control mice that were TAM-induced at E10.5 and analyzed at 3 weeks of age. Quantification of CSF1R expression on Lin<sup>-</sup> Sca-1<sup>-</sup> bone marrow cells (right). Data from 3 experiments was pooled. SD is shown.

Supplementary Figure 3

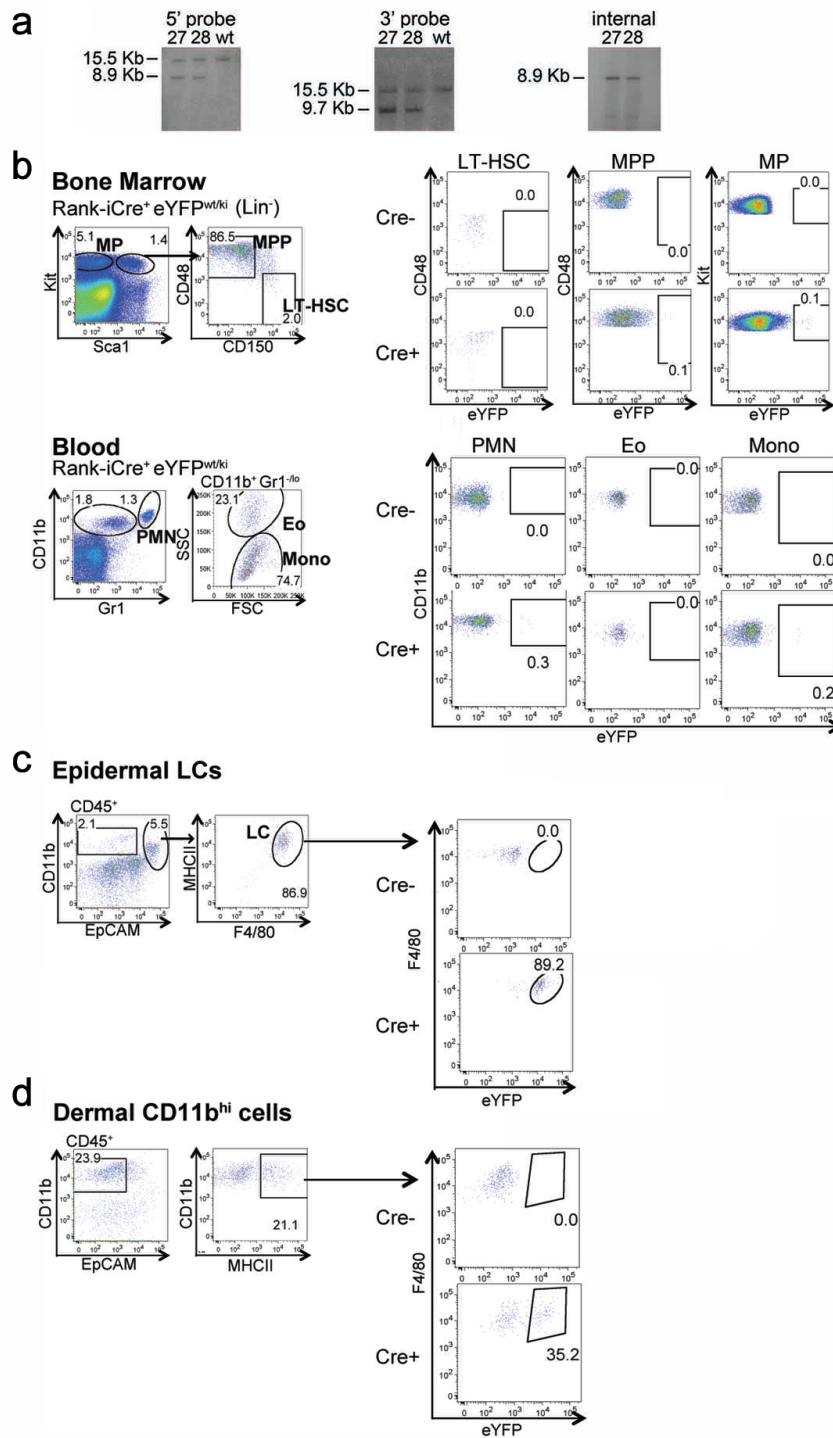

**Supplementary Fig. 3. Generation and lineage tracing using *Rank-iCre*<sup>+</sup> mice. (a)** Southern blot analysis reveals correct insertion of the construct into the *Rank* gene. **(b-d)** Identification of cell populations depicted in **Fig. 4c**.

**Table S1. List of all primers used in the manuscript.**

| Allele              | Fwd primer (5' --> 3')            | Rev primer (5' --> 3')             |
|---------------------|-----------------------------------|------------------------------------|
| <i>Rank-iCre+</i>   | AACCTGAGGATGTGAGGGACTA            | GTCAAAGTCAGTGC GTTCAAAG            |
| <i>CD11c-Cre+</i>   | GCCTGCATTACCGGTTCGATGCAACGA       | GTGGCAGATGGCGCGGCAACACCATT         |
| <i>Vav-Cre+</i>     | GCCTGCATTACCGGTTCGATGCAACGA       | GTGGCAGATGGCGCGGCAACACCATT         |
| <i>Pgk-Cre+</i>     | GCCTGCATTACCGGTTCGATGCAACGA       | GTGGCAGATGGCGCGGCAACACCATT         |
| <i>R26-CreERT2+</i> | GCCTGCATTACCGGTTCGATGCAACGA       | GTGGCAGATGGCGCGGCAACACCATT         |
| <i>CX3CR1-GFP+</i>  | CTTCTTCAAGGACGACGGCAACTA          | ATCGCGCTTCTCGTTGGGGTCTTTGC         |
| <i>Csf1r wt</i>     | TCTCCTGGGATGGGAAACGATCCCAA<br>GGC | GATTCAGGGTCCAAGGTCCAGATGGGAG<br>AG |
| <i>Csf1r -</i>      | GGTGGATGTGGAATGTGTGCG             | CGTTTCTTGTGGTCAGGGTGC              |
| <i>Csf1r F</i>      | ATCCTCAAACGTGGAGACACC             | GCCACCATGTCTCCGTGCTT               |
| <i>Csf1r del</i>    | CAGATGCTAGCCCTGTGATGG             | CTTCAAGCTGCAGCCCAAACCTC            |
| <i>Flt3 wt</i>      | TCCACGTTGTTCCCTCTACC              | TATGTGGGCAATTTGGCTCT               |
| <i>Flt3 -</i>       | TGATCTCGTCGTGACCCAT               | TATGTGGGCAATTTGGCTCT               |

### Supplementary References

- 1 Waskow, C. *et al.* The receptor tyrosine kinase Flt3 is required for dendritic cell development in peripheral lymphoid tissues. *Nat Immunol* **9**, 676-683 (2008).
- 2 Schlitzer, A. *et al.* Identification of cDC1- and cDC2-committed DC progenitors reveals early lineage priming at the common DC progenitor stage in the bone marrow. *Nat Immunol* **16**, 718-728 (2015).
- 3 Sichien, D. *et al.* IRF8 Transcription Factor Controls Survival and Function of Terminally Differentiated Conventional and Plasmacytoid Dendritic Cells, Respectively. *Immunity* **45**, 626-640 (2016).
- 4 Luche, H., Weber, O., Nageswara Rao, T., Blum, C. & Fehling, H. J. Faithful activation of an extra-bright red fluorescent protein in "knock-in" Cre-reporter mice ideally suited for lineage tracing studies. *Eur J Immunol* **37**, 43-53 (2007).
- 5 Liu, K. *et al.* In vivo analysis of dendritic cell development and homeostasis. *Science* **324**, 392-397 (2009).
